# Supplementary material for: Correlation between COVID-19 vaccination and inflammatory musculoskeletal disorders: analysis of Korean National Health Insurance database
Source: Research Square preprint supplement (doi:10.21203/rs.3.rs-5955129/v1), 2025-02-06
Supplement: Supplementary file 1 [file 3bb30c894bd6c14859217a2f.xlsx]

## Sheet: Incidence
Disease	Vaccine	total	1 week				2 weeks				4weeks				12weeks
			event	IR	95% CI	p	event	IR	95% CI	p	event	IR	95% CI	p	event	IR	95% CI	p
Plantar fasciitis	No	336075	11	0.33	0.13-0.52	<.001	32	0.95	0.62-1.28	<.001	49	1.46	1.05-1.87	<.001	147	4.37	3.67-5.08	<.001
	Yes	1882640	217	1.15	1.00-1.31		448	2.38	2.16-2.60		973	5.17	4.84-5.49		2823	14.99	14.44-15.55
Rotator cuff syndrome	No	336075	14	0.42	0.20-0.63	<.001	31	0.92	0.60-1.25	<.001	85	2.53	1.99-3.07	<.001	290	8.63	7.64-9.62	<.001
	Yes	1882640	391	2.08	1.87-2.28		874	4.64	4.33-4.95		1986	10.55	10.09-11.01		6292	33.42	32.60-34.25
Adhesive capsulitis	No	336075	27	0.80	0.50-1.11	<.001	49	1.46	1.05-1.87	<.001	111	3.30	2.69-3.92	<.001	353	10.50	9.41-11.60	<.001
	Yes	1882640	420	2.23	2.02-2.44		994	5.28	4.95-5.61		2297	12.20	11.70-12.70		7111	37.77	36.90-38.65
Herniated intervertebral disc	No	336075	20	0.60	0.33-0.86	<.001	42	1.25	0.87-1.63	<.001	83	2.47	1.94-3.00	<.001	261	7.77	6.82-8.71	<.001
	Yes	1882640	254	1.35	1.18-1.52		524	2.78	2.55-3.02		1121	5.95	5.61-6.30		3669	19.49	18.86-20.12
Spondylosis	No	336075	24	0.71	0.43-1.00	0.006	36	1.07	0.72-1.42	<.001	78	2.32	1.81-2.84	<.001	200	5.95	5.13-6.78	<.001
	Yes	1882640	239	1.27	1.11-1.43		507	2.69	2.46-2.93		1104	5.86	5.52-6.21		3458	18.37	17.76-18.98
Bursitis	No	336075	4	0.12	0.00-0.24	1.000	5	0.15	0.02-0.28	0.050	14	0.42	0.20-0.63	0.008	39	1.16	0.80-1.52	<.001
	Yes	1882640	27	0.14	0.09-0.20		69	0.37	0.28-0.45		158	0.84	0.71-0.97		532	2.83	2.59-3.07
Achilles tendinitis	No	336075	6	0.18	0.04-0.32	0.227	13	0.39	0.18-0.60	0.073	19	0.57	0.31-0.82	<.001	62	1.84	1.39-2.30	<.001
	Yes	1882640	60	0.32	0.24-0.40		123	0.65	0.54-0.77		256	1.36	1.19-1.53		829	4.40	4.10-4.70
De-Quervain tenosynovitis	No	336075	14	0.42	0.20-0.63	0.239	22	0.65	0.38-0.93	1.000	36	1.07	0.72-1.42	0.031	112	3.33	2.72-3.95	0.003
	Yes	1882640	55	0.29	0.21-0.37		124	0.66	0.54-0.77		293	1.56	1.38-1.73		842	4.47	4.17-4.77

## Sheet: Incidence2
Disease	Vaccine	total	1 week				2 weeks				4 weeks				12 weeks
			event	IR	95% CI	p	event	IR	95% CI	p	event	IR	95% CI	p	event	IR	95% CI	p
Plantar fasciitis	No	336075	11	0.33	0.13-0.52	<.001	32	0.95	0.62-1.28	<.001	49	1.46	1.05-1.87	<.001	147	4.37	3.67-5.08	<.001
	only mRNA vaccine	1100243	104	0.95	0.76-1.13		217	1.97	1.71-2.23		526	4.78	4.37-5.19		1510	13.72	13.03-14.42
	only cDNA vaccine	656184	96	1.46	1.17-1.76		194	2.96	2.54-3.37		370	5.64	5.06-6.21		1098	16.73	15.74-17.72
	Cross	126213	17	1.35	0.71-1.99		37	2.93	1.99-3.88		77	6.10	4.74-7.46		215	17.03	14.76-19.31
Rotator cuff syndrome	No	336075	14	0.42	0.20-0.63	<.001	31	0.92	0.60-1.25	<.001	85	2.53	1.99-3.07	<.001	290	8.63	7.64-9.62	<.001
	only mRNA vaccine	1100243	181	1.65	1.41-1.88		399	3.63	3.27-3.98		966	8.78	8.23-9.33		3153	28.66	27.66-29.66
	only cDNA vaccine	656184	180	2.74	2.34-3.14		412	6.28	5.67-6.88		890	13.56	12.67-14.45		2750	41.91	40.35-43.47
	Cross	126213	30	2.38	1.53-3.23		63	4.99	3.76-6.22		130	10.30	8.53-12.07		389	30.82	27.76-33.88
Adhesive capsulitis	No	336075	27	0.80	0.50-1.11	<.001	49	1.46	1.05-1.87	<.001	111	3.30	2.69-3.92	<.001	353	10.50	9.41-11.60	<.001
	only mRNA vaccine	1100243	209	1.90	1.64-2.16		471	4.28	3.89-4.67		1157	10.52	9.91-11.12		3644	33.12	32.05-34.19
	only cDNA vaccine	656184	189	2.88	2.47-3.29		466	7.10	6.46-7.75		1020	15.54	14.59-16.50		3100	47.24	45.58-48.90
	Cross	126213	22	1.74	1.01-2.47		57	4.52	3.34-5.69		120	9.51	7.81-11.21		367	29.08	26.11-32.05
Herniated intervertebral disc	No	336075	20	0.60	0.33-0.86	0.002	42	1.25	0.87-1.63	<.001	83	2.47	1.94-3.00	<.001	261	7.77	6.82-8.71	<.001
	only mRNA vaccine	1100243	143	1.30	1.09-1.51		272	2.47	2.18-2.77		574	5.22	4.79-5.64		1941	17.64	16.86-18.43
	only cDNA vaccine	656184	97	1.48	1.18-1.77		217	3.31	2.87-3.75		469	7.15	6.50-7.79		1506	22.95	21.79-24.11
	Cross	126213	14	1.11	0.53-1.69		35	2.77	1.85-3.69		78	6.18	4.81-7.55		222	17.59	15.28-19.90
Spondylosis	No	336075	24	0.71	0.43-1.00	0.001	36	1.07	0.72-1.42	<.001	78	2.32	1.81-2.84	<.001	200	5.95	5.13-6.78	<.001
	only mRNA vaccine	1100243	122	1.11	0.91-1.31		271	2.46	2.17-2.76		603	5.48	5.04-5.92		1863	16.93	16.16-17.70
	only cDNA vaccine	656184	104	1.58	1.28-1.89		209	3.19	2.75-3.62		442	6.74	6.11-7.36		1422	21.67	20.55-22.80
	Cross	126213	13	1.03	0.47-1.59		27	2.14	1.33-2.95		59	4.67	3.48-5.87		173	13.71	11.67-15.75
Bursitis	No	336075	4	0.12	0.00-0.24	0.404	5	0.15	0.02-0.28	0.090	14	0.42	0.20-0.63	0.031	39	1.16	0.80-1.52	<.001
	only mRNA vaccine	1100243	20	0.18	0.10-0.26		45	0.41	0.29-0.53		100	0.91	0.73-1.09		291	2.64	2.34-2.95
	only cDNA vaccine	656184	6	0.09	0.02-0.16		22	0.34	0.20-0.48		51	0.78	0.56-0.99		200	3.05	2.63-3.47
	Cross	126213	1	0.08	0.00-0.23		2	0.16	0.00-0.38		7	0.55	0.14-0.97		41	3.25	2.25-4.24
Achilles tendinitis	No	336075	6	0.18	0.04-0.32	0.074	13	0.39	0.18-0.60	0.091	19	0.57	0.31-0.82	0.001	62	1.84	1.39-2.30	<.001
	only mRNA vaccine	1100243	30	0.27	0.18-0.37		64	0.58	0.44-0.72		150	1.36	1.15-1.58		496	4.51	4.11-4.90
	only cDNA vaccine	656184	22	0.34	0.20-0.48		47	0.72	0.51-0.92		83	1.26	0.99-1.54		264	4.02	3.54-4.51
	Cross	126213	8	0.63	0.19-1.07		12	0.95	0.41-1.49		23	1.82	1.08-2.57		69	5.47	4.18-6.76
De-Quervain tenosynovitis	No	336075	14	0.42	0.20-0.63	0.484	22	0.65	0.38-0.93	0.839	36	1.07	0.72-1.42	0.171	112	3.33	2.72-3.95	0.031
	only mRNA vaccine	1100243	34	0.31	0.21-0.41		75	0.68	0.53-0.84		173	1.57	1.34-1.81		497	4.52	4.12-4.91
	only cDNA vaccine	656184	16	0.24	0.12-0.36		39	0.59	0.41-0.78		98	1.49	1.20-1.79		287	4.37	3.87-4.88
	Cross	126213	5	0.40	0.05-0.74		10	0.79	0.30-1.28		22	1.74	1.01-2.47		58	4.60	3.41-5.78

## Sheet: Logistic
Disease	Variable	value	1 week			2 weeks			4 weeks			12 weeks
			OR	95% CI	p	OR	95% CI	p	OR	95% CI	p	OR	95% CI	p
Plantar fasciitis	Vaccine	Yes	3.187	1.727-5.882	<.001	2.203	1.530-3.173	<.001	3.313	2.478-4.430	<.001	3.160	2.672-3.738	<.001
	Gender	Female	1.864	1.407-2.469	<.001	1.630	1.348-1.970	<.001	1.472	1.295-1.674	<.001	1.426	1.323-1.537	<.001
	Age		0.996	0.987-1.006	0.434	0.997	0.990-1.003	0.319	0.995	0.991-1.000	0.035	0.999	0.997-1.002	0.514
	Insurrance Level	Low
		Middle	0.994	0.685-1.442	0.976	1.065	0.826-1.372	0.628	1.130	0.951-1.342	0.166	1.039	0.940-1.149	0.455
		High	1.174	0.851-1.619	0.328	1.148	0.918-1.435	0.226	1.128	0.966-1.316	0.128	1.055	0.965-1.154	0.235
	CCI	0
		1	1.463	1.000-2.139	0.050	1.419	1.087-1.851	0.010	1.260	1.046-1.518	0.015	1.240	1.113-1.383	<.001
		2≤	1.318	0.836-2.077	0.234	1.256	0.917-1.722	0.156	1.228	0.988-1.527	0.064	1.210	1.066-1.374	0.003
	DM		0.862	0.564-1.319	0.494	0.976	0.733-1.300	0.868	0.963	0.786-1.179	0.714	0.883	0.784-0.995	0.041
	HTN		1.155	0.814-1.639	0.419	0.966	0.761-1.227	0.776	0.920	0.780-1.087	0.327	0.927	0.841-1.021	0.123
	HLD		1.144	0.805-1.626	0.453	1.452	1.140-1.850	0.003	1.432	1.212-1.693	<.001	1.359	1.233-1.497	<.001
	COPD		1.273	0.728-2.224	0.397	1.040	0.685-1.577	0.855	0.874	0.639-1.195	0.399	0.958	0.804-1.142	0.634
	COVID19								0.363	0.117-1.126	0.079	0.836	0.538-1.298	0.424
Rotator cuff syndrome	Vaccine	Yes	3.804	2.221-6.515	<.001	3.803	2.649-5.458	<.001	3.152	2.532-3.925	<.001	2.971	2.638-3.347	<.001
	Gender	Female	0.791	0.650-0.962	0.019	1.018	0.893-1.162	0.786	1.109	1.016-1.211	0.021	1.117	1.063-1.173	<.001
	Age		1.011	1.004-1.018	0.004	1.013	1.008-1.018	<.001	1.017	1.013-1.020	<.001	1.015	1.013-1.017	<.001
	Insurrance Level	Low
		Middle	1.176	0.889-1.556	0.256	1.012	0.838-1.222	0.904	1.089	0.962-1.234	0.178	1.044	0.975-1.119	0.217
		High	1.193	0.933-1.526	0.160	1.155	0.983-1.357	0.079	1.187	1.066-1.322	0.002	1.111	1.047-1.180	0.001
	CCI	0
		1	1.495	1.129-1.981	0.005	1.357	1.124-1.639	0.002	1.295	1.142-1.468	<.001	1.271	1.184-1.365	<.001
		2≤	1.352	0.975-1.874	0.070	1.198	0.962-1.492	0.106	1.257	1.090-1.450	0.002	1.179	1.086-1.280	<.001
	DM		0.826	0.617-1.105	0.198	0.831	0.683-1.013	0.066	0.780	0.683-0.889	<.001	0.875	0.812-0.942	<.001
	HTN		1.037	0.812-1.326	0.769	0.874	0.743-1.030	0.108	0.875	0.785-0.975	0.016	0.897	0.843-0.953	<.001
	HLD		1.425	1.107-1.835	0.006	1.674	1.415-1.980	<.001	1.545	1.383-1.726	<.001	1.495	1.404-1.591	<.001
	COPD		0.936	0.607-1.443	0.763	0.909	0.674-1.225	0.530	0.895	0.734-1.092	0.274	1.042	0.937-1.159	0.448
	COVID19		1.834	0.818-4.112	0.141	1.807	1.044-3.126	0.035	1.332	0.875-2.029	0.182	1.242	0.974-1.584	0.081
Adhesive capsulitis	Vaccine	Yes	2.074	1.398-3.077	<.001	2.616	1.958-3.496	<.001	2.705	2.232-3.280	<.001	2.689	2.413-2.996	<.001
	Gender	Female	1.005	0.833-1.212	0.960	1.105	0.977-1.250	0.113	1.184	1.091-1.284	<.001	1.227	1.171-1.286	<.001
	Age		1.023	1.016-1.030	<.001	1.024	1.019-1.028	<.001	1.022	1.019-1.025	<.001	1.020	1.019-1.022	<.001
	Insurrance Level	Low
		Middle	0.948	0.730-1.233	0.692	1.083	0.914-1.284	0.356	0.951	0.851-1.063	0.378	0.950	0.893-1.012	0.113
		High	1.014	0.811-1.269	0.900	1.035	0.891-1.201	0.655	0.947	0.861-1.043	0.271	0.925	0.876-0.977	0.005
	CCI	0
		1	1.540	1.179-2.010	0.002	1.338	1.119-1.599	0.001	1.328	1.182-1.493	<.001	1.167	1.090-1.249	<.001
		2≤	1.197	0.871-1.645	0.266	1.163	0.945-1.431	0.153	1.085	0.945-1.245	0.246	1.056	0.976-1.142	0.177
	DM		1.025	0.775-1.354	0.865	1.120	0.936-1.341	0.217	1.117	0.991-1.259	0.071	1.124	1.049-1.205	0.001
	HTN		0.819	0.649-1.034	0.094	0.907	0.780-1.056	0.208	0.916	0.829-1.013	0.087	0.924	0.873-0.979	0.007
	HLD		1.179	0.928-1.498	0.177	1.257	1.075-1.470	0.004	1.279	1.154-1.418	<.001	1.360	1.282-1.443	<.001
	COPD		0.922	0.608-1.398	0.703	1.055	0.815-1.365	0.685	1.064	0.896-1.264	0.478	1.012	0.915-1.120	0.814
	COVID19		1.942	0.919-4.103	0.082	1.054	0.547-2.033	0.875	0.712	0.421-1.205	0.206	0.741	0.552-0.994	0.045
Herniated intervertebral disc	Vaccine	Yes	2.020	1.271-3.209	0.003	1.847	1.341-2.543	<.001	1.968	1.569-2.470	<.001	2.069	1.821-2.350	<.001
	Gender	Female	1.204	0.945-1.534	0.132	1.215	1.026-1.438	0.024	1.109	0.989-1.244	0.076	1.091	1.024-1.163	0.007
	Age		1.003	0.995-1.012	0.474	1.006	1.000-1.012	0.070	1.004	1.000-1.008	0.082	1.005	1.003-1.007	<.001
	Insurrance Level	Low
		Middle	0.957	0.678-1.349	0.800	0.896	0.705-1.138	0.368	0.941	0.798-1.111	0.476	0.976	0.893-1.068	0.601
		High	1.184	0.884-1.586	0.258	1.146	0.938-1.400	0.183	1.216	1.058-1.397	0.006	1.126	1.043-1.216	0.002
	CCI	0
		1	1.109	0.768-1.604	0.580	1.222	0.952-1.568	0.116	1.441	1.219-1.703	<.001	1.368	1.247-1.501	<.001
		2≤	1.444	0.966-2.159	0.073	1.398	1.058-1.847	0.018	1.500	1.239-1.815	<.001	1.461	1.315-1.623	<.001
	DM		0.784	0.530-1.161	0.225	0.850	0.656-1.102	0.220	0.850	0.715-1.012	0.067	0.815	0.740-0.898	<.001
	HTN		0.904	0.658-1.242	0.532	0.927	0.748-1.150	0.492	0.867	0.749-1.004	0.056	0.938	0.865-1.017	0.123
	HLD		1.261	0.917-1.734	0.154	1.410	1.133-1.755	0.002	1.510	1.300-1.754	<.001	1.433	1.320-1.557	<.001
	COPD		1.323	0.803-2.179	0.272	1.287	0.917-1.806	0.145	1.314	1.047-1.648	0.018	1.142	1.000-1.304	0.050
	COVID19		0.435	0.061-3.095	0.406	1.258	0.562-2.814	0.577	1.369	0.808-2.320	0.244	1.308	0.968-1.768	0.080
Spondylosis	Vaccine	Yes	1.318	0.859-2.022	0.206	1.834	1.301-2.584	0.001	1.836	1.455-2.318	<.001	2.238	1.937-2.585	<.001
	Gender	Female	0.869	0.681-1.108	0.257	1.067	0.900-1.265	0.458	1.244	1.106-1.398	<.001	1.302	1.217-1.392	<.001
	Age		1.019	1.010-1.029	<.001	1.019	1.012-1.026	<.001	1.020	1.016-1.025	<.001	1.021	1.018-1.023	<.001
	Insurrance Level	Low
		Middle	1.066	0.765-1.486	0.704	1.094	0.873-1.372	0.435	1.157	0.993-1.349	0.062	0.990	0.908-1.079	0.817
		High	0.960	0.715-1.289	0.786	0.880	0.717-1.080	0.222	0.908	0.789-1.044	0.175	0.803	0.743-0.868	<.001
	CCI	0
		1	1.461	1.024-2.084	0.037	1.424	1.118-1.813	0.004	1.463	1.239-1.727	<.001	1.381	1.256-1.517	<.001
		2≤	1.682	1.136-2.491	0.009	1.399	1.062-1.842	0.017	1.590	1.321-1.913	<.001	1.462	1.316-1.625	<.001
	DM		0.773	0.541-1.105	0.158	0.729	0.568-0.935	0.013	0.818	0.693-0.966	0.018	0.846	0.770-0.930	0.001
	HTN		1.096	0.807-1.487	0.558	1.201	0.972-1.484	0.090	1.134	0.982-1.309	0.086	1.060	0.978-1.150	0.158
	HLD		1.146	0.839-1.565	0.391	1.314	1.060-1.629	0.013	1.198	1.035-1.387	0.015	1.325	1.220-1.440	<.001
	COPD		1.323	0.845-2.071	0.222	1.222	0.880-1.696	0.231	1.260	1.016-1.564	0.036	1.173	1.033-1.333	0.014
	COVID19		2.625	1.166-5.906	0.020	2.192	1.171-4.103	0.014	1.480	0.888-2.465	0.132	1.002	0.703-1.428	0.992
Bursitis	Vaccine	Yes	0.901	0.305-2.662	0.850	1.840	0.730-4.637	0.196	1.645	0.942-2.871	0.080	2.196	1.578-3.057	<.001
	Gender	Female	0.520	0.252-1.077	0.078	0.680	0.429-1.079	0.101	0.905	0.670-1.223	0.516	0.869	0.737-1.025	0.096
	Age		1.016	0.990-1.043	0.236	1.012	0.994-1.029	0.189	1.008	0.997-1.019	0.173	1.002	0.996-1.008	0.423
	Insurrance Level	Low
		Middle	0.883	0.319-2.444	0.811	1.003	0.464-2.167	0.994	0.962	0.603-1.534	0.870	1.161	0.911-1.481	0.227
		High	1.078	0.460-2.525	0.863	1.956	1.059-3.614	0.032	1.520	1.038-2.225	0.031	1.370	1.109-1.693	0.004
	CCI	0
		1	1.642	0.623-4.330	0.316	1.182	0.595-2.348	0.634	0.933	0.581-1.498	0.774	1.114	0.862-1.441	0.408
		2≤	1.228	0.378-3.996	0.732	1.461	0.701-3.044	0.312	1.303	0.792-2.146	0.298	1.189	0.886-1.595	0.249
	DM		0.359	0.107-1.202	0.097	0.650	0.321-1.317	0.232	0.686	0.419-1.124	0.134	1.040	0.791-1.366	0.779
	HTN		1.230	0.502-3.013	0.651	0.852	0.479-1.516	0.586	1.251	0.845-1.851	0.263	0.958	0.769-1.194	0.704
	HLD		1.483	0.605-3.637	0.389	1.833	1.016-3.308	0.044	1.261	0.849-1.873	0.250	1.137	0.908-1.423	0.263
	COPD		1.017	0.222-4.646	0.983	0.626	0.189-2.073	0.444	1.053	0.535-2.073	0.881	1.147	0.789-1.668	0.472
	COVID19		3.911	0.531-28.817	0.181	3.416	0.836-13.961	0.087	1.418	0.351-5.724	0.624	1.498	0.710-3.159	0.288
Achilles tendinitis	Vaccine	Yes	1.903	0.809-4.476	0.140	1.816	1.013-3.255	0.045	2.624	1.635-4.212	<.001	2.860	2.202-3.715	<.001
	Gender	Female	0.801	0.493-1.303	0.372	0.927	0.660-1.301	0.660	0.888	0.700-1.128	0.331	0.902	0.790-1.030	0.129
	Age		0.993	0.976-1.010	0.412	0.983	0.971-0.995	0.005	0.978	0.970-0.987	<.001	0.973	0.968-0.977	<.001
	Insurrance Level	Low
		Middle	1.513	0.738-3.102	0.259	0.822	0.504-1.340	0.432	0.988	0.702-1.390	0.944	1.067	0.889-1.281	0.486
		High	1.512	0.782-2.924	0.219	1.133	0.752-1.707	0.550	1.203	0.893-1.620	0.224	1.064	0.901-1.256	0.467
	CCI	0
		1	1.219	0.569-2.610	0.611	1.055	0.603-1.847	0.851	1.154	0.788-1.689	0.461	1.171	0.946-1.450	0.147
		2≤	1.412	0.587-3.395	0.441	1.367	0.731-2.554	0.328	1.173	0.747-1.840	0.488	1.373	1.071-1.759	0.012
	DM		0.653	0.258-1.653	0.369	1.131	0.618-2.068	0.690	0.988	0.645-1.513	0.955	0.739	0.575-0.950	0.018
	HTN		1.278	0.643-2.541	0.483	1.341	0.827-2.174	0.235	1.400	0.997-1.965	0.052	1.213	0.997-1.475	0.054
	HLD		0.744	0.367-1.509	0.413	0.905	0.550-1.487	0.693	1.122	0.795-1.585	0.511	1.261	1.038-1.533	0.020
	COPD		0.994	0.290-3.404	0.992	0.984	0.414-2.337	0.970	0.943	0.499-1.782	0.857	0.871	0.601-1.264	0.468
	COVID19		1.886	0.261-13.611	0.529	0.880	0.123-6.297	0.898	0.444	0.062-3.158	0.417	0.549	0.206-1.467	0.232
De-Quervain tenosynovitis	Vaccine	Yes	0.803	0.437-1.475	0.479	1.095	0.687-1.747	0.702	1.599	1.123-2.278	0.009	1.443	1.179-1.766	<.001
	Gender	Female	2.821	1.607-4.953	<.001	3.039	2.048-4.509	<.001	2.776	2.145-3.594	<.001	2.616	2.254-3.036	<.001
	Age		0.971	0.954-0.988	0.001	0.979	0.967-0.990	<.001	0.977	0.969-0.984	<.001	0.981	0.976-0.985	<.001
	Insurrance Level	Low
		Middle	1.122	0.594-2.119	0.722	0.954	0.622-1.463	0.829	0.861	0.647-1.145	0.302	0.914	0.773-1.081	0.293
		High	1.033	0.569-1.875	0.916	0.862	0.580-1.282	0.463	0.814	0.628-1.056	0.121	0.833	0.714-0.972	0.020
	CCI	0
		1	1.054	0.474-2.343	0.897	1.451	0.873-2.409	0.151	1.346	0.965-1.878	0.080	1.304	1.070-1.589	0.009
		2≤	1.057	0.412-2.709	0.909	1.062	0.562-2.006	0.853	1.207	0.804-1.811	0.364	1.224	0.965-1.552	0.095
	DM		1.053	0.424-2.613	0.912	1.268	0.708-2.270	0.425	0.860	0.581-1.272	0.449	1.018	0.813-1.275	0.875
	HTN		1.094	0.524-2.281	0.811	1.049	0.646-1.703	0.848	1.029	0.748-1.416	0.860	0.990	0.822-1.193	0.919
	HLD		1.803	0.886-3.670	0.104	1.332	0.823-2.155	0.243	1.603	1.175-2.188	0.003	1.445	1.203-1.735	<.001
	COPD		0.800	0.183-3.490	0.767	0.478	0.147-1.549	0.218	0.985	0.559-1.734	0.958	1.017	0.736-1.405	0.920
	COVID19					0.822	0.115-5.882	0.845	0.724	0.180-2.908	0.649	1.498	0.847-2.649	0.165

## Sheet: Logistic2
Disease	Variable	value	1 week			2 weeks			4 weeks			12 weeks
			OR	95% CI	p	OR	95% CI	p	OR	95% CI	p	OR	95% CI	p
Plantar fasciitis	Vaccine	No
		only mRNA vaccine	2.706	1.447-5.057	0.002	1.899	1.305-2.762	0.001	3.105	2.312-4.170	<.001	2.957	2.493-3.507	<.001
		only cDNA vaccine	4.261	2.231-8.137	<.001	2.770	1.872-4.101	<.001	3.642	2.675-4.958	<.001	3.486	2.918-4.166	<.001
		Cross	3.886	1.819-8.302	<.001	2.871	1.787-4.611	<.001	3.975	2.777-5.690	<.001	3.730	3.023-4.602	<.001
	Gender	Female	1.883	1.421-2.495	<.001	1.643	1.359-1.987	<.001	1.477	1.299-1.680	<.001	1.431	1.327-1.543	<.001
	Age		0.993	0.983-1.003	0.166	0.994	0.987-1.001	0.108	0.994	0.990-0.999	0.017	0.998	0.995-1.001	0.197
	Insurrance Level	Low
		Middle	0.996	0.686-1.445	0.982	1.068	0.829-1.377	0.609	1.132	0.953-1.345	0.157	1.042	0.942-1.152	0.427
		High	1.195	0.866-1.648	0.279	1.167	0.933-1.459	0.175	1.136	0.973-1.326	0.106	1.064	0.973-1.163	0.173
	CCI	0
		1	1.450	0.992-2.120	0.055	1.410	1.081-1.839	0.011	1.257	1.043-1.515	0.016	1.238	1.110-1.380	<.001
		2≤	1.332	0.847-2.094	0.215	1.268	0.926-1.735	0.139	1.233	0.993-1.532	0.058	1.216	1.071-1.380	0.003
	DM		0.863	0.564-1.320	0.497	0.977	0.734-1.300	0.872	0.963	0.787-1.180	0.719	0.884	0.784-0.996	0.042
	HTN		1.165	0.824-1.648	0.387	0.976	0.770-1.237	0.840	0.925	0.784-1.092	0.358	0.932	0.846-1.026	0.151
	HLD		1.106	0.779-1.570	0.573	1.411	1.108-1.796	0.005	1.416	1.198-1.673	<.001	1.342	1.218-1.479	<.001
	COPD		1.280	0.733-2.237	0.385	1.045	0.689-1.586	0.835	0.876	0.641-1.198	0.408	0.961	0.806-1.145	0.655
	COVID19								0.363	0.117-1.128	0.080	0.836	0.539-1.299	0.426
Rotator cuff syndrome	Vaccine	No
		only mRNA vaccine	3.239	1.873-5.599	<.001	3.210	2.222-4.637	<.001	2.817	2.253-3.522	<.001	2.732	2.420-3.084	<.001
		only cDNA vaccine	4.459	2.560-7.767	<.001	4.583	3.158-6.650	<.001	3.564	2.840-4.473	<.001	3.290	2.907-3.724	<.001
		Cross	5.457	2.890-10.304	<.001	5.137	3.338-7.903	<.001	3.958	3.009-5.207	<.001	3.469	2.978-4.040	<.001
	Gender	Female	0.798	0.655-0.971	0.024	1.028	0.901-1.173	0.684	1.116	1.022-1.218	0.014	1.122	1.068-1.179	<.001
	Age		1.010	1.002-1.018	0.010	1.012	1.007-1.018	<.001	1.016	1.013-1.020	<.001	1.015	1.013-1.017	<.001
	Insurrance Level	Low
		Middle	1.185	0.896-1.568	0.234	1.019	0.844-1.231	0.844	1.096	0.967-1.241	0.151	1.048	0.978-1.123	0.181
		High	1.219	0.952-1.559	0.116	1.182	1.006-1.388	0.042	1.206	1.083-1.343	0.001	1.125	1.060-1.194	<.001
	CCI	0
		1	1.486	1.122-1.968	0.006	1.350	1.118-1.630	0.002	1.290	1.138-1.462	<.001	1.267	1.180-1.360	<.001
		2≤	1.361	0.983-1.884	0.063	1.210	0.973-1.506	0.086	1.265	1.097-1.459	0.001	1.185	1.092-1.286	<.001
	DM		0.826	0.617-1.105	0.198	0.831	0.683-1.013	0.066	0.780	0.683-0.890	<.001	0.875	0.812-0.942	<.001
	HTN		1.044	0.818-1.333	0.727	0.884	0.752-1.040	0.137	0.882	0.791-0.982	0.022	0.902	0.849-0.959	0.001
	HLD		1.393	1.082-1.792	0.010	1.625	1.374-1.921	<.001	1.515	1.357-1.692	<.001	1.472	1.383-1.567	<.001
	COPD		0.943	0.612-1.454	0.791	0.915	0.679-1.235	0.563	0.900	0.738-1.097	0.296	1.046	0.941-1.164	0.404
	COVID19		1.840	0.821-4.124	0.139	1.811	1.046-3.133	0.034	1.334	0.876-2.032	0.180	1.243	0.975-1.585	0.080
Adhesive capsulitis	Vaccine	No
		only mRNA vaccine	1.913	1.276-2.868	0.002	2.301	1.710-3.096	<.001	2.527	2.076-3.075	<.001	2.550	2.284-2.847	<.001
		only cDNA vaccine	2.313	1.530-3.496	<.001	3.012	2.231-4.065	<.001	2.958	2.422-3.611	<.001	2.905	2.596-3.251	<.001
		Cross	2.197	1.249-3.866	0.006	3.160	2.154-4.636	<.001	2.894	2.234-3.749	<.001	2.768	2.390-3.205	<.001
	Gender	Female	1.011	0.838-1.219	0.911	1.114	0.985-1.260	0.086	1.190	1.097-1.291	<.001	1.233	1.177-1.292	<.001
	Age		1.022	1.015-1.030	<.001	1.023	1.018-1.028	<.001	1.022	1.018-1.025	<.001	1.020	1.018-1.022	<.001
	Insurrance Level	Low
		Middle	0.950	0.731-1.235	0.704	1.089	0.919-1.291	0.323	0.953	0.853-1.065	0.400	0.952	0.894-1.013	0.122
		High	1.027	0.821-1.285	0.817	1.054	0.908-1.223	0.490	0.957	0.869-1.054	0.371	0.932	0.883-0.985	0.012
	CCI	0
		1	1.533	1.174-2.001	0.002	1.329	1.112-1.588	0.002	1.323	1.177-1.488	<.001	1.163	1.087-1.245	<.001
		2≤	1.203	0.876-1.652	0.253	1.169	0.951-1.438	0.138	1.089	0.949-1.250	0.223	1.059	0.980-1.146	0.148
	DM		1.024	0.775-1.353	0.868	1.120	0.936-1.341	0.216	1.117	0.991-1.259	0.071	1.124	1.049-1.205	0.001
	HTN		0.824	0.653-1.039	0.102	0.914	0.787-1.063	0.244	0.921	0.833-1.017	0.104	0.928	0.876-0.982	0.010
	HLD		1.162	0.915-1.475	0.219	1.230	1.052-1.438	0.009	1.262	1.139-1.399	<.001	1.345	1.268-1.426	<.001
	COPD		0.926	0.611-1.405	0.719	1.062	0.820-1.374	0.649	1.068	0.899-1.269	0.453	1.015	0.918-1.123	0.767
	COVID19		1.943	0.920-4.104	0.082	1.055	0.547-2.034	0.874	0.712	0.421-1.205	0.206	0.741	0.552-0.994	0.045
Herniated intervertebral disc	Vaccine	No
		only mRNA vaccine	2.001	1.248-3.211	0.004	1.720	1.239-2.390	0.001	1.813	1.437-2.288	<.001	1.971	1.730-2.246	<.001
		only cDNA vaccine	2.138	1.295-3.529	0.003	2.043	1.448-2.880	<.001	2.200	1.726-2.805	<.001	2.257	1.969-2.587	<.001
		Cross	1.786	0.902-3.540	0.096	2.103	1.342-3.296	0.001	2.327	1.707-3.172	<.001	2.141	1.789-2.561	<.001
	Gender	Female	1.206	0.947-1.537	0.129	1.220	1.030-1.444	0.021	1.114	0.993-1.250	0.065	1.095	1.027-1.166	0.005
	Age		1.002	0.994-1.011	0.599	1.005	0.999-1.011	0.134	1.003	0.998-1.007	0.199	1.004	1.002-1.007	<.001
	Insurrance Level	Low
		Middle	0.955	0.677-1.347	0.792	0.898	0.706-1.141	0.379	0.944	0.800-1.115	0.500	0.977	0.893-1.069	0.612
		High	1.186	0.885-1.589	0.253	1.157	0.946-1.414	0.155	1.229	1.069-1.412	0.004	1.134	1.050-1.225	0.001
	CCI	0
		1	1.108	0.766-1.601	0.586	1.217	0.949-1.562	0.122	1.435	1.214-1.696	<.001	1.364	1.243-1.497	<.001
		2≤	1.447	0.968-2.162	0.072	1.403	1.063-1.853	0.017	1.505	1.245-1.821	<.001	1.465	1.319-1.628	<.001
	DM		0.784	0.529-1.160	0.224	0.851	0.656-1.102	0.221	0.851	0.715-1.012	0.068	0.815	0.739-0.898	<.001
	HTN		0.904	0.658-1.242	0.533	0.932	0.752-1.155	0.518	0.872	0.753-1.009	0.066	0.941	0.868-1.020	0.140
	HLD		1.254	0.911-1.725	0.165	1.391	1.118-1.731	0.003	1.488	1.281-1.728	<.001	1.418	1.306-1.541	<.001
	COPD		1.325	0.804-2.182	0.270	1.291	0.920-1.813	0.140	1.319	1.051-1.654	0.017	1.146	1.003-1.308	0.045
	COVID19		0.435	0.061-3.093	0.405	1.259	0.563-2.816	0.576	1.370	0.809-2.323	0.242	1.309	0.968-1.769	0.080
Spondylosis	Vaccine	No
		only mRNA vaccine	1.242	0.797-1.937	0.339	1.811	1.274-2.575	0.001	1.844	1.453-2.341	<.001	2.232	1.926-2.586	<.001
		only cDNA vaccine	1.405	0.889-2.222	0.145	1.829	1.273-2.628	0.001	1.777	1.390-2.273	<.001	2.226	1.914-2.589	<.001
		Cross	1.491	0.757-2.936	0.249	2.036	1.234-3.359	0.005	2.078	1.479-2.918	<.001	2.345	1.912-2.877	<.001
	Gender	Female	0.872	0.683-1.112	0.270	1.066	0.899-1.265	0.460	1.241	1.104-1.395	<.001	1.301	1.217-1.391	<.001
	Age		1.019	1.010-1.029	<.001	1.019	1.013-1.026	<.001	1.021	1.016-1.025	<.001	1.021	1.018-1.024	<.001
	Insurrance Level	Low
		Middle	1.069	0.767-1.490	0.692	1.096	0.875-1.374	0.425	1.160	0.995-1.352	0.058	0.991	0.909-1.080	0.833
		High	0.968	0.721-1.301	0.830	0.881	0.718-1.082	0.228	0.907	0.788-1.043	0.172	0.804	0.744-0.869	<.001
	CCI	0
		1	1.455	1.020-2.076	0.038	1.424	1.118-1.813	0.004	1.465	1.241-1.729	<.001	1.381	1.256-1.518	<.001
		2≤	1.684	1.138-2.493	0.009	1.398	1.062-1.842	0.017	1.588	1.320-1.911	<.001	1.462	1.315-1.625	<.001
	DM		0.774	0.541-1.105	0.158	0.729	0.568-0.936	0.013	0.818	0.693-0.966	0.018	0.846	0.770-0.930	0.001
	HTN		1.098	0.810-1.488	0.548	1.202	0.973-1.485	0.089	1.134	0.982-1.309	0.086	1.060	0.978-1.150	0.157
	HLD		1.137	0.832-1.552	0.420	1.314	1.059-1.629	0.013	1.202	1.038-1.392	0.014	1.326	1.220-1.441	<.001
	COPD		1.327	0.847-2.077	0.217	1.222	0.880-1.696	0.231	1.259	1.015-1.563	0.036	1.173	1.033-1.333	0.014
	COVID19		2.626	1.167-5.909	0.020	2.193	1.172-4.104	0.014	1.481	0.889-2.466	0.132	1.002	0.703-1.428	0.992
Bursitis	Vaccine	No
		only mRNA vaccine	1.199	0.400-3.593	0.746	2.150	0.843-5.478	0.109	1.831	1.039-3.226	0.036	2.097	1.496-2.939	<.001
		only cDNA vaccine	0.470	0.127-1.739	0.258	1.481	0.545-4.023	0.441	1.372	0.744-2.531	0.311	2.269	1.587-3.243	<.001
		Cross	0.654	0.072-5.891	0.705	0.967	0.187-4.999	0.968	1.266	0.510-3.142	0.611	2.700	1.740-4.189	<.001
	Gender	Female	0.509	0.246-1.054	0.069	0.675	0.425-1.070	0.095	0.899	0.665-1.215	0.488	0.871	0.738-1.027	0.101
	Age		1.018	0.993-1.044	0.156	1.012	0.995-1.029	0.163	1.009	0.998-1.020	0.125	1.002	0.996-1.009	0.448
	Insurrance Level	Low
		Middle	0.876	0.317-2.426	0.799	0.994	0.460-2.148	0.987	0.957	0.600-1.527	0.855	1.165	0.914-1.485	0.218
		High	1.019	0.434-2.392	0.965	1.910	1.033-3.533	0.039	1.495	1.020-2.190	0.039	1.376	1.113-1.700	0.003
	CCI	0
		1	1.659	0.626-4.395	0.308	1.186	0.596-2.361	0.627	0.937	0.583-1.505	0.788	1.113	0.861-1.439	0.413
		2≤	1.193	0.362-3.931	0.772	1.444	0.691-3.021	0.329	1.293	0.784-2.132	0.315	1.191	0.888-1.597	0.244
	DM		0.362	0.108-1.210	0.099	0.651	0.321-1.318	0.233	0.686	0.419-1.123	0.134	1.041	0.792-1.367	0.774
	HTN		1.228	0.493-3.059	0.659	0.844	0.472-1.508	0.566	1.246	0.840-1.849	0.274	0.961	0.772-1.198	0.725
	HLD		1.569	0.633-3.889	0.331	1.887	1.042-3.420	0.036	1.287	0.865-1.916	0.213	1.131	0.904-1.416	0.282
	COPD		0.998	0.218-4.564	0.998	0.620	0.187-2.053	0.434	1.045	0.531-2.057	0.899	1.150	0.791-1.672	0.465
	COVID19		3.884	0.526-28.655	0.183	3.404	0.833-13.911	0.088	1.416	0.351-5.716	0.625	1.500	0.711-3.163	0.287
Achilles tendinitis	Vaccine	No
		only mRNA vaccine	1.586	0.654-3.843	0.308	1.581	0.866-2.886	0.136	2.500	1.546-4.044	<.001	2.716	2.082-3.542	<.001
		only cDNA vaccine	2.194	0.838-5.745	0.109	2.364	1.220-4.581	0.011	2.818	1.663-4.776	<.001	3.404	2.536-4.570	<.001
		Cross	3.572	1.236-10.322	0.019	2.467	1.123-5.419	0.025	3.188	1.734-5.863	<.001	3.096	2.195-4.368	<.001
	Gender	Female	0.807	0.496-1.313	0.387	0.932	0.664-1.309	0.686	0.890	0.701-1.130	0.339	0.904	0.791-1.032	0.136
	Age		0.992	0.974-1.010	0.383	0.980	0.967-0.993	0.002	0.978	0.969-0.987	<.001	0.971	0.966-0.976	<.001
	Insurrance Level	Low
		Middle	1.522	0.742-3.121	0.252	0.822	0.504-1.340	0.432	0.988	0.702-1.391	0.947	1.065	0.887-1.278	0.499
		High	1.525	0.788-2.951	0.210	1.147	0.761-1.728	0.513	1.207	0.896-1.625	0.216	1.069	0.905-1.262	0.432
	CCI	0
		1	1.215	0.568-2.600	0.616	1.047	0.598-1.833	0.872	1.152	0.787-1.687	0.465	1.168	0.943-1.446	0.155
		2≤	1.421	0.593-3.408	0.431	1.374	0.737-2.562	0.318	1.175	0.749-1.843	0.482	1.377	1.075-1.764	0.011
	DM		0.656	0.259-1.660	0.374	1.132	0.619-2.070	0.688	0.989	0.646-1.514	0.958	0.738	0.574-0.949	0.018
	HTN		1.293	0.652-2.562	0.462	1.342	0.830-2.169	0.230	1.403	1.000-1.968	0.050	1.210	0.995-1.471	0.056
	HLD		0.734	0.362-1.486	0.390	0.887	0.540-1.456	0.634	1.116	0.790-1.575	0.533	1.248	1.027-1.516	0.026
	COPD		1.001	0.292-3.428	0.999	0.992	0.417-2.357	0.985	0.945	0.500-1.786	0.862	0.873	0.602-1.266	0.474
	COVID19		1.894	0.262-13.677	0.527	0.880	0.123-6.300	0.899	0.444	0.062-3.160	0.417	0.549	0.205-1.466	0.231
De-Quervain tenosynovitis	Vaccine	No
		only mRNA vaccine	0.781	0.415-1.469	0.443	1.074	0.663-1.738	0.772	1.537	1.070-2.208	0.020	1.404	1.141-1.728	0.001
		only cDNA vaccine	0.817	0.366-1.819	0.620	1.133	0.639-2.009	0.668	1.846	1.221-2.791	0.004	1.627	1.284-2.060	<.001
		Cross	0.950	0.341-2.648	0.921	1.183	0.559-2.503	0.661	1.597	0.938-2.718	0.085	1.350	0.982-1.855	0.064
	Gender	Female	2.823	1.608-4.957	<.001	3.041	2.049-4.513	<.001	2.782	2.149-3.602	<.001	2.622	2.259-3.043	<.001
	Age		0.970	0.953-0.989	0.001	0.978	0.966-0.991	0.001	0.975	0.967-0.983	<.001	0.979	0.975-0.984	<.001
	Insurrance Level	Low
		Middle	1.124	0.595-2.122	0.719	0.954	0.622-1.464	0.831	0.859	0.646-1.142	0.295	0.912	0.771-1.078	0.280
		High	1.035	0.570-1.880	0.909	0.864	0.581-1.284	0.469	0.816	0.629-1.058	0.125	0.834	0.715-0.973	0.021
	CCI	0
		1	1.054	0.474-2.342	0.897	1.450	0.873-2.408	0.151	1.344	0.963-1.875	0.082	1.301	1.068-1.586	0.009
		2≤	1.057	0.413-2.710	0.907	1.063	0.563-2.008	0.850	1.212	0.808-1.818	0.353	1.228	0.969-1.557	0.090
	DM		1.054	0.425-2.617	0.909	1.268	0.708-2.271	0.424	0.859	0.580-1.271	0.446	1.017	0.812-1.274	0.882
	HTN		1.098	0.526-2.289	0.804	1.050	0.647-1.705	0.843	1.029	0.748-1.415	0.861	0.990	0.822-1.191	0.912
	HLD		1.800	0.883-3.667	0.106	1.327	0.820-2.150	0.249	1.582	1.159-2.161	0.004	1.429	1.189-1.716	<.001
	COPD		0.800	0.183-3.490	0.767	0.478	0.147-1.549	0.218	0.985	0.560-1.735	0.959	1.018	0.736-1.407	0.915
	COVID19					0.823	0.115-5.885	0.846	0.724	0.180-2.906	0.648	1.497	0.847-2.647	0.165
